# Supplementary material for: Pharmaceutical Functionalization of Monomeric Ionic Liquid for the Preparation of Ionic Graft Polymer Conjugates
Source: MDPI journal article supplement (doi:10.3390/ijms232314731), 2022-11-25
Supplement: s1 [file s1]

## Supplementary Materials

### Pharmaceutical functionalization of monomeric ionic liquid for the preparation of ionic graft polymer conjugates

Aleksy Mazur, Katarzyna Niesyto, Dorota Neugebauer\*

Department of Physical Chemistry and Technology of Polymers, Faculty of Chemistry,  
Silesian University of Technology, 44-100 Gliwice, Poland;

\* Correspondence: [dorota.neugebauer@polsl.pl](mailto:dorota.neugebauer@polsl.pl)

#### Contents:

**Figure S1.** IR spectra of pharmaceutically functionalized monomeric IL.

**Figure S2.** FT-IR spectra of TMAMA based copolymers.

**Figure S3.** Fragments of  $^1\text{H}$  NMR spectra with signals of trimethylammonium groups in IL monomers before and after ion exchange.

**Figure S4.**  $^1\text{H}$  NMR spectrum of  $\text{G\_CLX}^-/\text{FUS}^-$  copolymer after purification.

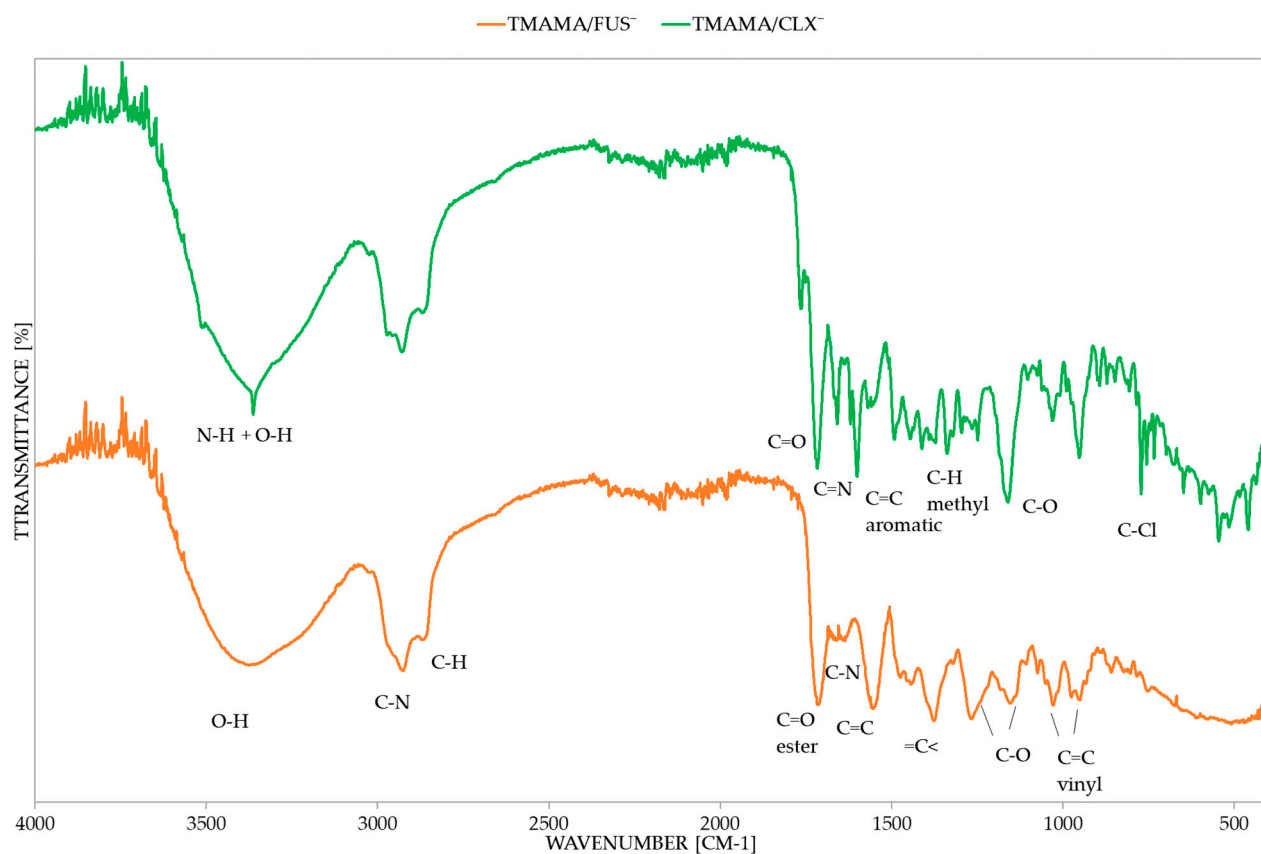

**Figure S1.** IR spectra of pharmaceutically functionalized monomeric IL.

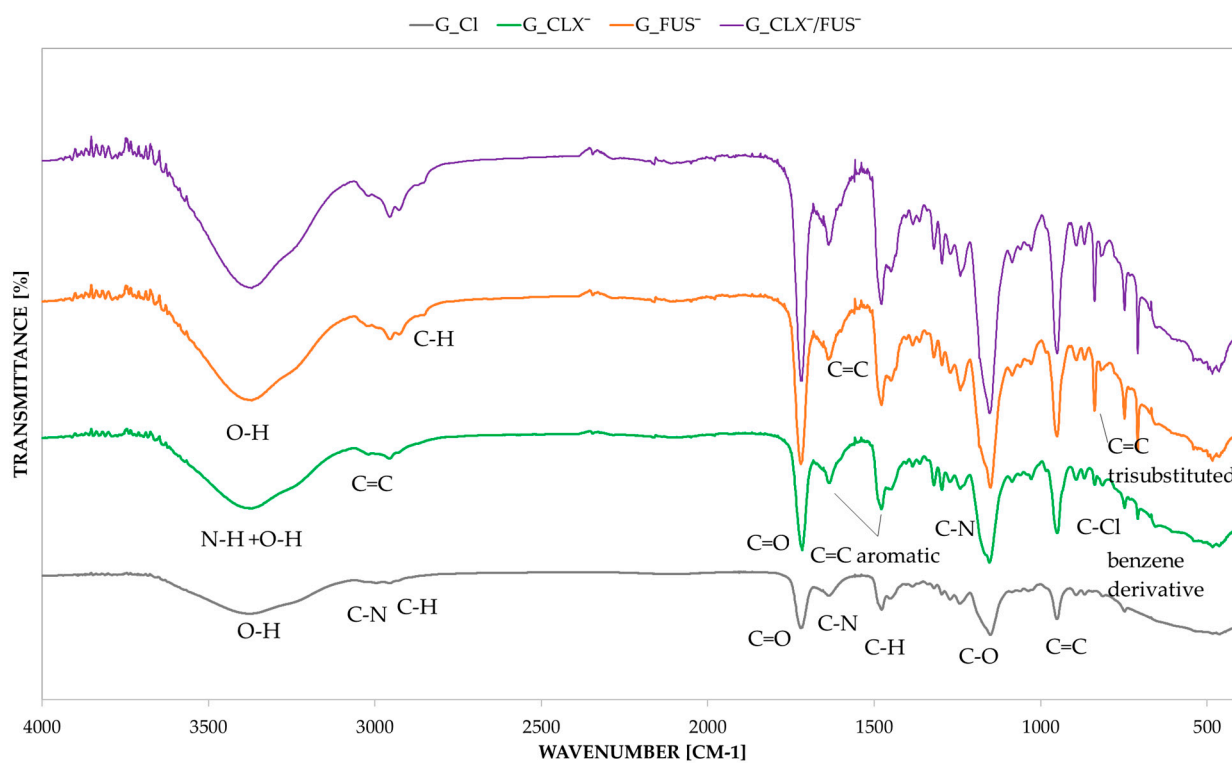

**Figure S2.** FT-IR spectra of TMAMA based copolymers.

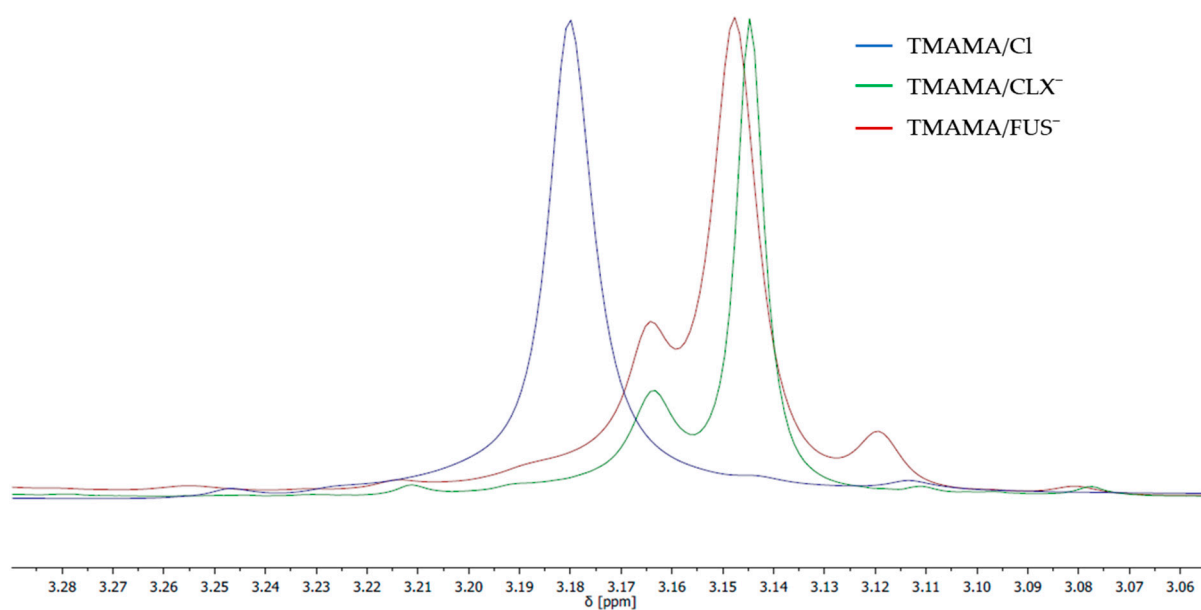

**Figure S3.** Fragments of  $^1\text{H}$  NMR spectra with signals of trimethylammonium groups in IL monomers before and after ion exchange.

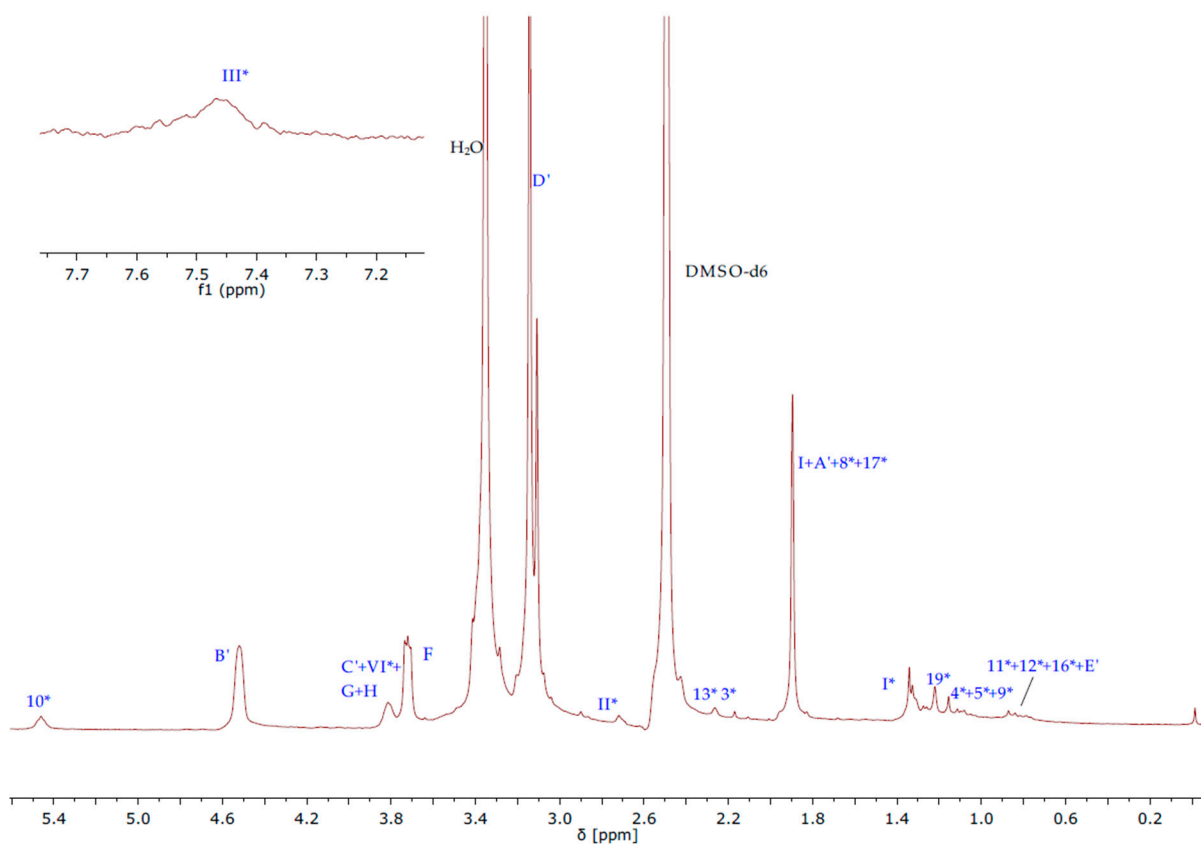

**Figure S4.**  $^1\text{H}$  NMR spectrum of  $\text{G-CLX}^-/\text{FUS}^-$  copolymer after purification where the signals coming from pharmaceutical anions are denoted using the symbol \*.
